# Supplementary material
Source: PubMed Central journal article supplement (PMC5928456)
Supplement: kwx328yuanwebmaterialfinal.pdf [file kwx328yuanwebmaterialfinal.pdf]

## **WEB APPENDIX: BIOMARKER MEASUREMENT METHOD**

### **Doubly labeled water (DLW)**

Energy intake is estimated as the amount of carbon dioxide produced over a 10- to 14-day period, assuming that the individuals are in energy balance (1). WLVS participants were provided with a specimen collection kit (including bottled DLW) for DLW Urine collection. Participants first provided two spot urine samples (10 mL each) before oral intake of water labeled with nonradioactive  $^2\text{H}_2^{18}\text{O}$ , and then provided two spot urine samples (10 mL each) at 4.5 hours and 6 hours later. After 10 to 14 days, participants provided two more post dose urine samples following the same procedures; the two urine samples were separated by at least 30 minutes or more. Participant weight, date, time and volume of each urine collection, and date and time of DLW dose were collected. Urine specimens were assessed at Dr. Jennifer Rood's Mass Spectrometry Laboratory at Pennington Biomedical Research Center via mass spectroscopic analysis for deuterium ( $^2\text{H}$ ) and heavy oxygen ( $^{18}\text{O}$ ) (2–4). The relative decrease in deuterium and oxygen-18 concentrations was used to calculate total daily energy expenditure (TDEE) as described by Schoeller et al. (3, 4).

### **24-hour urine**

WLVS participants were provided with a specimen collection kit to self-collect 24-hour urine samples. The urine collection started after the first morning void and continued until the first morning void of the following morning. Participants were asked to not take medications containing, acetaminophen, sulphonamides, or vitamin supplements during the 24-hour urine collection period. Starting and ending time/date of collection, the time and approximate amount of the missed sample and total volume collected were recorded. Participants' sample collection kits was picked-up by FedEx and shipped with the cold pack by overnight mail to Fisher BioServices, Inc. 50 mL of urine samples were stored for immediate and further analyses. Sample collection, return and processing were carefully monitored to reduce error by Fisher BioServices. Urinary nitrogen, sodium and potassium concentrations were measured at the Tufts University Human Nutrition Research Center on Aging Nutrition Evaluation Laboratory. Urinary potassium and sodium were measured using ion selective electrode methods with the Olympus AU400

analyzer (Olympus, Tokyo, Japan). Urinary nitrogen was measured by a Dumas method of combustion–detection by a Thermal Conductivity Cell assay (FP2000 Nitrogen Analyzer, LECO Corporation, LECO Corporation, St. Joseph, MI). Urinary values for nitrogen, sodium and potassium were calculated multiplying the urinary concentrations by reported total urine volumes. Urinary nitrogen in grams was divided by 0.81 to convert the measurement to dietary nitrogen and was then multiplied by 6.25 to obtain the dietary protein intake (g/day) (5). Urinary values were divided by 0.86 for sodium, and 0.80 for potassium to convert them to the corresponding dietary values (mg/day) (6, 7).

### **Fasting plasma**

Participants were asked to have their blood collected by a friend, colleague, or a local laboratory. Blood specimens were collected twice about six months apart. Participants were provided with a specimen collection kit to collect fasting blood samples. The first blood collection was 30 mL consisting of three 10 mL Heparin tubes, and the second blood collection was 40 mL consisting of four 10 mL Heparin blood tubes. Participants were asked to have their blood drawn in the morning after fasting for 12 hours. For each blood sample, information on fasting status, blood collection time and date, menopausal status, smoking status, use of replacement hormones, physical activity, and weight, was recorded. Participants' sample collection kits was picked-up by FedEx and shipped with a cold pack by overnight mail to Fisher BioServices, Inc. Then, whole blood samples were centrifuged for 20 minutes at 2500 RPM and 4 degrees C. Plasma was aliquoted into three small cryovials: two 0.5-mL (one for folate, and one for carotenoids and fatty acids determinations), one 0.2-mL (for lipid determinations).

Plasma fatty acids, expressed as percentages of total fatty acids, were measured by gas liquid chromatography in the laboratory of Dr. Campos at the Department of Nutrition, Harvard T.H. Chan School of Public Health as previously described (8, 9). Around 40 fatty acids were identified (mean coefficient of variation (CV) = 18.1). Our analysis focused on the specific fatty acids of greatest epidemiologic interest, recognizing that the concentrations of some in plasma, such as saturated and monounsaturated fatty acids, are minimally influenced by diet because they can be endogenously synthesized. Also, the saturated fat 15:0, 17:0, and *trans*-fatty acid 16:1 were compared with dairy fat

intake assessed by our SFFQ (10–12). Plasma carotenoids (mean CV = 9.7), retinol (8.6) and tocopherols (mean CV = 9.3) were measured by high-performance liquid chromatography as described by Hess et al. (13) with some modifications. Because lutein and zeaxanthin co-elute on the chromatogram, the two are grouped and presented as lutein + zeaxanthin. Plasma folate (CV = 9.2) was determined by chemiluminescence using Immulite 1000 at the Vitamin Metabolism Laboratory at Tufts University. Blood lipids (total cholesterol, HDL cholesterol, and triglycerides) were determined enzymatically by the Lipid Metabolism Laboratory at Tufts University.

## References

1. Schoeller DA, Hnilicka JM. Reliability of the doubly labeled water method for the measurement of total daily energy expenditure in free-living subjects. *J Nutr*. 1996;126(1):348S–354S.
2. Racette SB, Schoeller DA, Luke AH, et al. Relative dilution spaces of  $^2\text{H}$ - and  $^{18}\text{O}$ -labeled water in humans. *Am J Physiol*. 1994;267(4):E585–E590.
3. Schoeller DA, Colligan AS, Shriver T, et al. Use of an automated chromium reduction system for hydrogen isotope ratio analysis of physiological fluids applied to doubly labeled water analysis. *J Mass Spectrom*. 2000;35(9):1128–1132.
4. Schoeller DA, Luke AH. Rapid  $^{18}\text{O}$  analysis of  $\text{CO}_2$  samples by continuous-flow isotope ratio mass spectrometry. *J Mass Spectrom*. 1997;32(12):1332–1336.
5. Bingham SA, Cummings JH. Urine nitrogen as an independent validatory measure of dietary intake: a study of nitrogen balance in individuals consuming their normal diet. *Am J Clin Nutr*. 1985;42(6):1276–1289.
6. Holbrook JT, Patterson KY, Bodner JE, et al. Sodium and potassium intake and balance in adults consuming self-selected diets. *Am J Clin Nutr*. 1984;40(4):786–793.
7. Freedman LS, Commins JM, Moler JE, et al. Pooled results from 5 validation studies of dietary self-report instruments using recovery biomarkers for potassium and sodium intake. *Am J Epidemiol*. 2015;181(7):473–87.
8. Baylin A, Kabagambe EK, Siles X, et al. Adipose tissue biomarkers of fatty acid intake. *Am J Clin Nutr*. 2002;76(4):750–757.
9. El-Sohemy A, Baylin A, Kabagambe E, et al. Individual carotenoid concentrations in adipose tissue and plasma as biomarkers of dietary intake. *Am J Clin Nutr*. 2002;76(1):172–179.
10. Wolk A, Vessby B, Ljung H. Evaluation of a biological marker of dairy fat intake. *Am J Clin Nutr*. 1998;68(2):291–295.
11. Wolk A, Furuheim M, Vessby B. Fatty acid composition of adipose tissue and serum lipids are valid biological markers of dairy fat intake in men. *J Nutr*. 2001;131(3):828–833.
12. Smedman AE, Gustafsson IB, Berglund LG, et al. Pentadecanoic acid in serum as a marker for intake of milk fat: relations between intake of milk fat and metabolic risk factors. *Am J Clin Nutr*. 1999;69(1):22–29.
13. Baylin A, Kabagambe EK, Siles X, et al. Adipose tissue biomarkers of fatty acid intake. *Am J Clin Nutr*. 2002;76(4):750–757.
14. Hess D, Keller HE, Oberlin B, et al. Simultaneous determination of retinol, tocopherols, carotenes and lycopene in plasma by means of high-performance liquid chromatography on reversed phase. *Int J Vit Res*. 1991;61:232–238.

**Web Table 1.** Within-person (CV%w) and between-person (CV%b) coefficients of variation for repeated assessments of energy, protein density, sodium density, potassium density, fatty acids, carotenoids, retinol tocopherols and folate estimated by SFFQs 7DDR<sub>s</sub> ASA24<sub>s</sub> and biomarkers (data provided by 627 U.S. female nurses aged 45–80 years, 2010–2012)

| Nutrient <sup>a</sup>                            | Biomarker |      |      | SFFQ |      |      | 7DDR |      |      | ASA24 |      |      |
|--------------------------------------------------|-----------|------|------|------|------|------|------|------|------|-------|------|------|
|                                                  | Mean      | CV%w | CV%b | Mean | CV%w | CV%b | Mean | CV%w | CV%b | Mean  | CV%w | CV%b |
| <b>Total energy, Kcal/day</b>                    | 2194      | 9    | 14   | 1890 | 15   | 23   | 1738 | 13   | 17   | 1811  | 28   | 18   |
| <b>Protein density, %energy</b>                  | 15        | 23   | 15   | 18   | 10   | 14   | 17   | 12   | 15   | 17    | 26   | 14   |
| <b>Sodium density, mg/1000 kcal</b>              | 159       | 32   | 18   | 112  | 11   | 17   | 154  | 15   | 15   | 174   | 30   | 14   |
| <b>Potassium density, mg/1000 kcal</b>           | 143       | 27   | 25   | 180  | 9    | 14   | 155  | 12   | 19   | 158   | 25   | 18   |
| <b>Fatty acids, %total fatty acids or fat</b>    |           |      |      |      |      |      |      |      |      |       |      |      |
| Saturated fatty acids                            | 31        | 10   | 3    | 35   | 10   | 14   | 33   | 10   | 12   | 34    | 22   | 11   |
| Monounsaturated fatty acids                      | 22        | 7    | 11   | 38   | 6    | 8    | 36   | 8    | 7    | 36    | 14   | 5    |
| Polyunsaturated fatty acids                      |           |      |      |      |      |      |      |      |      |       |      |      |
| Alpha-linolenic acid 18:3n-3c                    | 0.6       | 23   | 27   | 2.3  | 27   | 37   | 2.3  | 27   | 38   | 2.2   | 68   | 26   |
| Long Chain n-3 DHA+DPA+EPA                       | 3.5       | 21   | 40   | 0.8  | 45   | 79   | 0.5  | 79   | 108  | N/A   | N/A  | N/A  |
| Long Chain n-3 <sup>b</sup>                      | 2.8       | 23   | 29   | 0.4  | 70   | 77   | 0.3  | 100  | 104  | 0.3   | 288  | 21   |
| Linoleic acid 18:2n-6cc                          | 30        | 8    | 10   | 18   | 13   | 15   | 20   | 16   | 15   | 19    | 33   | 15   |
| Total PUFA                                       | 45        | 7    | 6    | 22   | 12   | 15   | 22   | 15   | 15   | 22    | 33   | 15   |
| <i>Trans</i> -Fatty acids                        | 1.1       | 36   | 14   | 2.7  | 14   | 20   | 3.3  | 33   | 25   | N/A   | N/A  | N/A  |
| <b>Carotenoids, ug/L or ug/day</b>               |           |      |      |      |      |      |      |      |      |       |      |      |
| Lutein-zeaxanthin                                | 283       | 18   | 49   | 3901 | 47   | 59   | 2701 | 69   | 91   | 2598  | 133  | 76   |
| Beta cryptoxanthin                               | 159       | 42   | 80   | 115  | 42   | 75   | 154  | 149  | 53   | 101   | 206  | 79   |
| Lycopene                                         | 432       | 24   | 34   | 5678 | 46   | 59   | 4988 | 74   | 49   | 5011  | 147  | 45   |
| Alpha carotene                                   | 101       | 44   | 84   | 888  | 51   | 77   | 613  | 74   | 61   | 501   | 164  | 118  |
| Beta carotene                                    | 396       | 31   | 96   | 6630 | 36   | 52   | 4293 | 55   | 53   | N/A   | N/A  | N/A  |
| Beta carotene <sup>b</sup>                       | 347       | 24   | 97   | 6475 | 34   | 49   | 3988 | 55   | 56   | 3464  | 112  | 56   |
| <b>Retinol activity equivalents, ug/L or day</b> |           |      |      |      |      |      |      |      |      |       |      |      |
| Retinol activity equivalents                     | 620       | 12   | 19   | 1844 | 41   | 61   | 1481 | 73   | 71   | N/A   | N/A  | N/A  |
| Retinol activity equivalents <sup>b</sup>        | 592       | 13   | 18   | 1016 | 37   | 30   | 788  | 56   | 31   | 759   | 99   | 38   |
| <b>Tocopherols, mg/L or mg/day</b>               |           |      |      |      |      |      |      |      |      |       |      |      |
| Alpha- tocopherol                                | 14131     | 21   | 28   | 43   | 85   | 139  | 37   | 71   | 136  | N/A   | N/A  | N/A  |

|                                         |       |    |    |      |    |    |      |    |    |     |     |     |
|-----------------------------------------|-------|----|----|------|----|----|------|----|----|-----|-----|-----|
| Alpha- tocopherol <sup>b</sup>          | 11418 | 21 | 16 | 11   | 87 | 27 | 9    | 25 | 36 | 8   | 56  | 29  |
| Gama - tocopherol                       | 1437  | 27 | 48 | 10   | 26 | 34 | 11   | 31 | 27 | N/A | N/A | N/A |
| <b>Folate, ng/ml or ug/day</b>          |       |    |    |      |    |    |      |    |    |     |     |     |
| Dietary folate equivalents              | 32    | 69 | 47 | 1148 | 32 | 44 | 1062 | 30 | 64 | N/A | N/A | N/A |
| Dietary folate equivalents <sup>b</sup> | 19    | 81 | 61 | 622  | 56 | 31 | 518  | 24 | 38 | 484 | 53  | 30  |

Abbreviations: SFFQ, The semi-quantitative food frequency questionnaire; 7DDR, 7 Day Dietary Records; ASA24, Web-based, self-administered 24-hour dietary recall; CV, coefficients of variation;

<sup>a</sup>Two energy biomarker DLW, 9-12 months apart; four urinary biomarkers, approximately every three months over one year; two energy-adjusted urinary biomarkers, 9-12 months apart; two plasma biomarkers, approximately 6 months apart; Two SFFQs, approximately one year apart; Two 7DDRs, approximately 6 months apart; Four ASA24s, approximately every three months over one year.

<sup>b</sup>Subgroups of women who didn't take supplements for this nutrient ( $N = 363$  for long-chain n-3 fatty acids, 335 for beta-carotene, 207 for retinol, 148 for alpha-tocopherol, and 134 for folate).

**Web Table 2.** Spearman correlation coefficients between energy, protein, potassium sodium and Na/K ratio estimated from ASA24, SFFQ, WebFFQ, 7DDR and urinary recovery biomarkers (data provided by 624 U.S. female nurses aged 45–80 years, 2010–2012)

| Nutrient                | Unadjusted<br><i>r</i> | Deattenuated<br><i>r</i> | 95% CI       | Energy-<br>Adjusted <sup>a</sup><br><i>r</i> | Deattenuated<br><i>r</i> | 95% CI       |
|-------------------------|------------------------|--------------------------|--------------|----------------------------------------------|--------------------------|--------------|
| <b>Energy</b>           |                        |                          |              |                                              |                          |              |
| Single ASA24            | 0.14                   | 0.16                     | (0.06, 0.26) | N/A                                          | N/A                      | N/A          |
| Averaged ASA24          | 0.18                   | 0.20                     | (0.11, 0.29) | N/A                                          | N/A                      | N/A          |
| SFFQ2                   | 0.09                   | 0.11                     | (0.02, 0.19) | N/A                                          | N/A                      | N/A          |
| SFFQ1 and 2             | 0.10                   | 0.12                     | (0.03, 0.20) | N/A                                          | N/A                      | N/A          |
| WebFFQ                  | 0.12                   | 0.14                     | (0.05, 0.22) | N/A                                          | N/A                      | N/A          |
| Single 7DDR             | 0.38                   | 0.43                     | (0.35, 0.50) | N/A                                          | N/A                      | N/A          |
| Averaged 7DDR           | 0.40                   | 0.46                     | (0.37, 0.53) | N/A                                          | N/A                      | N/A          |
| <b>Protein</b>          |                        |                          |              |                                              |                          |              |
| Single ASA24            | 0.31                   | 0.32                     | (0.23, 0.40) | 0.25                                         | 0.37                     | (0.19, 0.52) |
| Averaged ASA24          | 0.39                   | 0.42                     | (0.35, 0.49) | 0.33                                         | 0.54                     | (0.34, 0.70) |
| SFFQ2                   | 0.25                   | 0.27                     | (0.19, 0.35) | 0.29                                         | 0.46                     | (0.27, 0.62) |
| SFFQ1 and 2             | 0.29                   | 0.32                     | (0.25, 0.39) | 0.33                                         | 0.52                     | (0.31, 0.68) |
| WebFFQ                  | 0.26                   | 0.29                     | (0.21, 0.37) | 0.28                                         | 0.46                     | (0.27, 0.61) |
| Single 7DDR             | 0.67                   | 0.64                     | (0.58, 0.69) | 0.38                                         | 0.59                     | (0.36, 0.76) |
| Averaged 7DDR           | 0.65                   | 0.71                     | (0.65, 0.75) | 0.42                                         | 0.67                     | (0.41, 0.83) |
| <b>Potassium</b>        |                        |                          |              |                                              |                          |              |
| Single ASA24            | 0.40                   | 0.43                     | (0.35, 0.51) | 0.33                                         | 0.41                     | (0.29, 0.51) |
| Averaged ASA24          | 0.48                   | 0.52                     | (0.44, 0.58) | 0.43                                         | 0.52                     | (0.41, 0.61) |
| SFFQ2                   | 0.32                   | 0.36                     | (0.29, 0.43) | 0.38                                         | 0.49                     | (0.38, 0.58) |
| SFFQ1 and 2             | 0.34                   | 0.40                     | (0.33, 0.47) | 0.39                                         | 0.49                     | (0.38, 0.58) |
| WebFFQ                  | 0.32                   | 0.35                     | (0.28, 0.42) | 0.32                                         | 0.42                     | (0.32, 0.51) |
| Single 7DDR             | 0.65                   | 0.68                     | (0.62, 0.73) | 0.46                                         | 0.59                     | (0.48, 0.68) |
| Averaged 7DDR           | 0.65                   | 0.73                     | (0.67, 0.78) | 0.50                                         | 0.64                     | (0.52, 0.72) |
| <b>Sodium</b>           |                        |                          |              |                                              |                          |              |
| Single ASA24            | 0.24                   | 0.24                     | (0.14, 0.34) | 0.15                                         | 0.25                     | (0.08, 0.40) |
| Averaged ASA24          | 0.29                   | 0.35                     | (0.26, 0.42) | 0.19                                         | 0.36                     | (0.17, 0.53) |
| SFFQ2                   | 0.16                   | 0.18                     | (0.10, 0.27) | 0.25                                         | 0.48                     | (0.25, 0.65) |
| SFFQ1 and 2             | 0.18                   | 0.21                     | (0.11, 0.29) | 0.26                                         | 0.49                     | (0.25, 0.67) |
| WebFFQ                  | 0.15                   | 0.18                     | (0.09, 0.27) | 0.26                                         | 0.46                     | (0.23, 0.65) |
| Single 7DDR             | 0.43                   | 0.52                     | (0.43, 0.58) | 0.29                                         | 0.49                     | (0.23, 0.67) |
| Averaged 7DDR           | 0.48                   | 0.57                     | (0.49, 0.64) | 0.32                                         | 0.54                     | (0.26, 0.74) |
| <b>Na/K<sup>b</sup></b> |                        |                          |              |                                              |                          |              |
| Single ASA24            | 0.36                   | 0.40                     | (0.32, 0.48) | N/A                                          | N/A                      | N/A          |
| Averaged ASA24          | 0.39                   | 0.53                     | (0.46, 0.60) | N/A                                          | N/A                      | N/A          |
| SFFQ2                   | 0.45                   | 0.53                     | (0.46, 0.60) | N/A                                          | N/A                      | N/A          |
| SFFQ1 and 2             | 0.51                   | 0.57                     | (0.50, 0.63) | N/A                                          | N/A                      | N/A          |
| WebFFQ                  | 0.43                   | 0.49                     | (0.41, 0.55) | N/A                                          | N/A                      | N/A          |
| Single 7DDR             | 0.59                   | 0.66                     | (0.60, 0.71) | N/A                                          | N/A                      | N/A          |
| Averaged 7DDR           | 0.65                   | 0.73                     | (0.67, 0.78) | N/A                                          | N/A                      | N/A          |

Abbreviations: SFFQ, The semi-quantitative food frequency questionnaire; WebFFQ: web-based version of the SFFQ; 7DDR, 7 Day Dietary Records; ASA24, Web-based, self-administered 24-hour dietary recall.

<sup>a</sup> Protein, sodium and potassium from self-reported measures and recovery biomarker were adjusted for total energy intake using energy density method.

<sup>b</sup> Sodium/potassium (Na/K) ratio was calculated from sodium value divided by potassium value.



**Web Table 3.** *P* values for pairwise comparisons among deattenuated and energy-adjusted Spearman correlation coefficients with recovery biomarkers (data provided by 624 U.S. female nurses aged 45–80 years, 2010–2012)

| <b>Comparison</b>     | <b>Protein<sup>a</sup><br/>(% energy)</b> | <b>Sodium<sup>a</sup><br/>(mg/1000 kcal)</b> | <b>Potassium<sup>a</sup><br/>(mg/1000 kcal)</b> | <b>Na/K<sup>b</sup></b> | <b>Energy<br/>(kcal/day)</b> |
|-----------------------|-------------------------------------------|----------------------------------------------|-------------------------------------------------|-------------------------|------------------------------|
| <b>SFFQ2</b>          |                                           |                                              |                                                 |                         |                              |
| vs SFFQ1 and 2        | 0.61                                      | 0.76                                         | 0.64                                            | 0.70                    | 0.87                         |
| vs Single ASA24       | 0.20                                      | 0.01                                         | 0.07                                            | 0.04                    | 0.25                         |
| vs Averaged ASA24     | 0.20                                      | 0.02                                         | 0.07                                            | 0.07                    | 0.22                         |
| vs Single 7DDR        | 0.03                                      | 0.28                                         | 0.02                                            | 0.001                   | <0.001                       |
| vs Averaged 7DDR      | 0.03                                      | 0.27                                         | 0.02                                            | 0.003                   | <0.001                       |
| <b>SFFQ1 and 2</b>    |                                           |                                              |                                                 |                         |                              |
| vs Single ASA24       | 0.09                                      | 0.01                                         | 0.21                                            | 0.02                    | 0.18                         |
| vs Averaged ASA24     | 0.10                                      | 0.01                                         | 0.20                                            | 0.04                    | 0.16                         |
| vs Single 7DDR        | 0.03                                      | 0.20                                         | 0.01                                            | 0.001                   | <0.001                       |
| vs Averaged 7DDR      | 0.03                                      | 0.19                                         | 0.01                                            | 0.003                   | <0.001                       |
| <b>Single ASA24</b>   |                                           |                                              |                                                 |                         |                              |
| vs Averaged ASA24     | 0.97                                      | 0.88                                         | 0.93                                            | 0.65                    | 0.93                         |
| vs Single 7DDR        | <0.001                                    | <0.001                                       | <0.001                                          | <0.001                  | <0.001                       |
| vs Averaged 7DDR      | <0.001                                    | <0.001                                       | <0.001                                          | <0.001                  | <0.001                       |
| <b>Averaged ASA24</b> |                                           |                                              |                                                 |                         |                              |
| vs Single 7DDR        | <0.001                                    | <0.001                                       | <0.001                                          | <0.001                  | 0.37                         |
| vs Averaged 7DDR      | <0.001                                    | <0.001                                       | <0.001                                          | <0.001                  | <0.001                       |
| <b>Single 7DDR</b>    |                                           |                                              |                                                 |                         |                              |
| vs Averaged 7DDR      | 0.99                                      | 0.99                                         | 0.99                                            | 0.99                    | 1.00                         |

Abbreviation: SFFQ, The semi-quantitative food frequency questionnaire; 7DDR, 7 Day Dietary Records; ASA24, Web-based, automated-self-administered 24-hour dietary recall.

<sup>a</sup>Protein, sodium and potassium from self-reported measures and recovery biomarker were adjusted for total energy intake using energy density method;

<sup>b</sup>Sodium/potassium (Na/K) ratio was calculated from sodium value divided by potassium value.

**Web Table 4.** Spearman correlation coefficients between specific fatty acids ( of total fatty acids) estimated from ASA24, SFFQ, WebFFQ, 7DDR and plasma fatty acids biomarkers (data provided by 627 U.S. female nurses aged 45–80 years, 2010–2012)

| <b>Nutrient</b>                        | <b>Unadjusted<br/><i>r</i></b> | <b>Adjusted<sup>a</sup><br/><i>r</i></b> | <b>Deattenuated<br/><i>r</i></b> | <b>95% CI</b> |
|----------------------------------------|--------------------------------|------------------------------------------|----------------------------------|---------------|
| <b>Saturated fatty acids</b>           |                                |                                          |                                  |               |
| Single ASA24                           | 0.04                           | 0.03                                     | 0.06                             | (-0.12, 0.24) |
| Averaged ASA24                         | 0.07                           | 0.05                                     | 0.10                             | (-0.05, 0.24) |
| SFFQ2                                  | 0.09                           | 0.08                                     | 0.15                             | (0.00, 0.29)  |
| SFFQ1 and 2                            | 0.09                           | 0.08                                     | 0.15                             | (0.00, 0.29)  |
| WebFFQ                                 | 0.12                           | 0.10                                     | 0.19                             | (0.03, 0.33)  |
| Single 7DDR                            | 0.16                           | 0.16                                     | 0.30                             | (0.14, 0.43)  |
| Averaged 7DDR                          | 0.18                           | 0.17                                     | 0.33                             | (0.17, 0.47)  |
| <b>Monounsaturated fatty acids</b>     |                                |                                          |                                  |               |
| Single ASA24                           | 0.02                           | 0.04                                     | 0.05                             | (-0.06, 0.15) |
| Averaged ASA24                         | 0.02                           | 0.06                                     | 0.07                             | (-0.02, 0.15) |
| SFFQ2                                  | 0.04                           | 0.07                                     | 0.08                             | (-0.01, 0.17) |
| SFFQ1 and 2                            | 0.05                           | 0.08                                     | 0.09                             | (0.00, 0.17)  |
| WebFFQ                                 | 0.04                           | 0.06                                     | 0.07                             | (-0.03, 0.15) |
| Single 7DDR                            | 0.04                           | 0.03                                     | 0.04                             | (-0.06, 0.12) |
| Averaged 7DDR                          | 0.04                           | 0.03                                     | 0.04                             | (-0.05, 0.12) |
| <b>Alpha-linolenic acid (18:3n-3c)</b> |                                |                                          |                                  |               |
| Single ASA24                           | 0.18                           | 0.17                                     | 0.21                             | (0.10, 0.31)  |
| Averaged ASA24                         | 0.22                           | 0.22                                     | 0.27                             | (0.18, 0.36)  |
| SFFQ2                                  | 0.28                           | 0.28                                     | 0.34                             | (0.25, 0.42)  |
| SFFQ1 and 2                            | 0.34                           | 0.34                                     | 0.41                             | (0.32, 0.49)  |
| WebFFQ                                 | 0.30                           | 0.30                                     | 0.36                             | (0.28, 0.44)  |
| Single 7DDR                            | 0.34                           | 0.34                                     | 0.42                             | (0.33, 0.50)  |
| Averaged 7DDR                          | 0.39                           | 0.39                                     | 0.48                             | (0.39, 0.56)  |
| <b>Long Chain n-3 (DHA+DPA+EPA)</b>    |                                |                                          |                                  |               |
| SFFQ2                                  | 0.57                           | 0.56                                     | 0.62                             | (0.56, 0.68)  |
| SFFQ1 and 2                            | 0.61                           | 0.61                                     | 0.66                             | (0.60, 0.71)  |
| WebFFQ                                 | 0.56                           | 0.57                                     | 0.61                             | (0.55, 0.66)  |
| Single 7DDR                            | 0.61                           | 0.60                                     | 0.66                             | (0.60, 0.71)  |
| Averaged 7DDR                          | 0.67                           | 0.66                                     | 0.74                             | (0.68, 0.79)  |
| <b>Long Chain n-3<sup>b</sup></b>      |                                |                                          |                                  |               |
| Single ASA24                           | 0.19                           | 0.19                                     | 0.23                             | (0.09, 0.36)  |
| Averaged ASA24                         | 0.31                           | 0.30                                     | 0.36                             | (0.25, 0.46)  |
| SFFQ2                                  | 0.57                           | 0.53                                     | 0.58                             | (0.47, 0.66)  |
| SFFQ1 and 2                            | 0.61                           | 0.56                                     | 0.64                             | (0.54, 0.72)  |
| WebFFQ                                 | 0.49                           | 0.44                                     | 0.52                             | (0.41, 0.61)  |
| Single 7DDR                            | 0.47                           | 0.46                                     | 0.53                             | (0.42, 0.62)  |
| Averaged 7DDR                          | 0.55                           | 0.52                                     | 0.61                             | (0.51, 0.69)  |
| <b>Linoleic acid (18:2n-6cc)</b>       |                                |                                          |                                  |               |
| Single ASA24                           | 0.06                           | 0.06                                     | 0.08                             | (-0.04, 0.19) |

|                                    |      |      |      |               |
|------------------------------------|------|------|------|---------------|
| Averaged ASA24                     | 0.10 | 0.10 | 0.13 | (0.03, 0.22)  |
| SFFQ2                              | 0.16 | 0.20 | 0.25 | (0.16, 0.34)  |
| SFFQ1 and 2                        | 0.17 | 0.20 | 0.25 | (0.16, 0.35)  |
| WebFFQ                             | 0.18 | 0.19 | 0.23 | (0.14, 0.33)  |
| Single 7DDR                        | 0.21 | 0.20 | 0.25 | (0.15, 0.34)  |
| Averaged 7DDR                      | 0.25 | 0.23 | 0.29 | (0.20, 0.38)  |
| <b>Polyunsaturated fatty acids</b> |      |      |      |               |
| Single ASA24                       | 0.08 | 0.06 | 0.09 | (-0.04, 0.22) |
| Averaged ASA24                     | 0.11 | 0.09 | 0.14 | (0.03, 0.24)  |
| SFFQ2                              | 0.16 | 0.18 | 0.27 | (0.15, 0.37)  |
| SFFQ1 and 2                        | 0.18 | 0.19 | 0.27 | (0.16, 0.37)  |
| WebFFQ                             | 0.19 | 0.17 | 0.25 | (0.13, 0.36)  |
| Single 7DDR                        | 0.21 | 0.19 | 0.28 | (0.16, 0.38)  |
| Averaged 7DDR                      | 0.24 | 0.22 | 0.32 | (0.21, 0.42)  |
| <b>Trans-Fatty Acids</b>           |      |      |      |               |
| SFFQ2                              | 0.29 | 0.27 | 0.33 | (0.16, 0.48)  |
| SFFQ1 and 2                        | 0.32 | 0.30 | 0.42 | (0.25, 0.57)  |
| WebFFQ                             | 0.30 | 0.27 | 0.38 | (0.19, 0.57)  |
| Single 7DDR                        | 0.28 | 0.27 | 0.46 | (0.30, 0.59)  |
| Averaged 7DDR                      | 0.33 | 0.30 | 0.53 | (0.36, 0.66)  |

Abbreviations: SFFQ, The semi-quantitative food frequency questionnaire; WebFFQ: web-based version of the SFFQ; 7DDR, 7 Day Dietary Records; ASA24, Web-based, self-administered 24-hour dietary recall; BMI, body mass index.

<sup>a</sup> Fatty acid biomarkers and associated self-reported fatty acid composition were adjusted for age and BMI at enrollment, current weight and smoking status at each measurement, fatty acid biomarkers were further adjusted for postmenopausal status, hormone use, and fasting status at blood drawing.

<sup>b</sup> Analyses for long-chain n-3 fatty acids was performed among subgroups of women ( $N = 363$ ) not taking fatty acid supplement.

**Web Table 5.** Spearman correlation coefficients between carotenoids, retinol, tocopherol and folate intakes estimated from ASA24, SFFQ, WebFFQ, 7DDR and plasma concentration biomarkers (data provided by 627 U.S. female nurses aged 45–80 years, 2010–2012)

| <b>Nutrient</b>                  | <b>Unadjusted<br/><i>r</i></b> | <b>Adjusted<sup>a</sup><br/><i>r</i></b> | <b>Deattenuated<br/><i>r</i></b> | <b>95% CI</b> |
|----------------------------------|--------------------------------|------------------------------------------|----------------------------------|---------------|
| <b>Lycopene</b>                  |                                |                                          |                                  |               |
| Single ASA24                     | 0.17                           | 0.14                                     | 0.16                             | (0.06, 0.28)  |
| Averaged ASA24                   | 0.22                           | 0.20                                     | 0.25                             | (0.15, 0.34)  |
| SFFQ2                            | 0.26                           | 0.28                                     | 0.33                             | (0.24, 0.41)  |
| SFFQ1 and 2                      | 0.26                           | 0.30                                     | 0.32                             | (0.22, 0.40)  |
| WebFFQ                           | 0.27                           | 0.30                                     | 0.37                             | (0.28, 0.45)  |
| Single 7DDR                      | 0.28                           | 0.32                                     | 0.37                             | (0.28, 0.45)  |
| Averaged 7DDR                    | 0.35                           | 0.40                                     | 0.47                             | (0.38, 0.55)  |
| <b>Alpha-carotene</b>            |                                |                                          |                                  |               |
| Single ASA24                     | 0.29                           | 0.25                                     | 0.27                             | (0.18, 0.36)  |
| Averaged ASA24                   | 0.37                           | 0.34                                     | 0.37                             | (0.30, 0.44)  |
| SFFQ2                            | 0.47                           | 0.47                                     | 0.51                             | (0.44, 0.57)  |
| SFFQ1 and 2                      | 0.49                           | 0.51                                     | 0.56                             | (0.49, 0.62)  |
| WebFFQ                           | 0.42                           | 0.42                                     | 0.46                             | (0.39, 0.53)  |
| Single 7DDR                      | 0.46                           | 0.47                                     | 0.51                             | (0.44, 0.57)  |
| Averaged 7DDR                    | 0.55                           | 0.55                                     | 0.60                             | (0.53, 0.65)  |
| <b>Beta-carotene</b>             |                                |                                          |                                  |               |
| SFFQ2                            | 0.39                           | 0.40                                     | 0.41                             | (0.35, 0.48)  |
| SFFQ1 and 2                      | 0.43                           | 0.44                                     | 0.47                             | (0.40, 0.53)  |
| WebFFQ                           | 0.35                           | 0.36                                     | 0.39                             | (0.32, 0.45)  |
| Single 7DDR                      | 0.45                           | 0.45                                     | 0.48                             | (0.41, 0.54)  |
| Averaged 7DDR                    | 0.52                           | 0.53                                     | 0.56                             | (0.50, 0.62)  |
| <b>Beta-carotene<sup>b</sup></b> |                                |                                          |                                  |               |
| Single ASA24                     | 0.31                           | 0.22                                     | 0.24                             | (0.11, 0.36)  |
| Averaged ASA24                   | 0.42                           | 0.33                                     | 0.36                             | (0.25, 0.45)  |
| SFFQ2                            | 0.46                           | 0.48                                     | 0.47                             | (0.37, 0.56)  |
| SFFQ1 and 2                      | 0.47                           | 0.50                                     | 0.50                             | (0.40, 0.59)  |
| WebFFQ                           | 0.40                           | 0.39                                     | 0.41                             | (0.32, 0.51)  |
| Single 7DDR                      | 0.48                           | 0.46                                     | 0.50                             | (0.40, 0.58)  |
| Averaged 7DDR                    | 0.54                           | 0.53                                     | 0.58                             | (0.49, 0.66)  |
| <b>Lutein-zeaxanthin</b>         |                                |                                          |                                  |               |
| Single ASA24                     | 0.27                           | 0.23                                     | 0.25                             | (0.16, 0.34)  |
| Averaged ASA24                   | 0.33                           | 0.29                                     | 0.32                             | (0.24, 0.39)  |
| SFFQ2                            | 0.33                           | 0.32                                     | 0.35                             | (0.28, 0.42)  |
| SFFQ1 and 2                      | 0.35                           | 0.35                                     | 0.38                             | (0.31, 0.45)  |
| WebFFQ                           | 0.29                           | 0.30                                     | 0.33                             | (0.26, 0.40)  |
| Single 7DDR                      | 0.40                           | 0.39                                     | 0.42                             | (0.34, 0.49)  |
| Averaged 7DDR                    | 0.46                           | 0.45                                     | 0.48                             | (0.41, 0.55)  |
| <b>Beta-cryptoxanthin</b>        |                                |                                          |                                  |               |
| Single ASA24                     | 0.32                           | 0.29                                     | 0.33                             | (0.24, 0.42)  |

|                                                 |       |      |      |               |
|-------------------------------------------------|-------|------|------|---------------|
| Averaged ASA24                                  | 0.42  | 0.40 | 0.45 | (0.37, 0.52)  |
| SFFQ2                                           | 0.40  | 0.41 | 0.46 | (0.38, 0.53)  |
| SFFQ1 and 2                                     | 0.43  | 0.44 | 0.50 | (0.42, 0.56)  |
| WebFFQ                                          | 0.40  | 0.41 | 0.45 | (0.37, 0.52)  |
| Single 7DDR                                     | 0.42  | 0.39 | 0.44 | (0.36, 0.50)  |
| Averaged 7DDR                                   | 0.50  | 0.47 | 0.53 | (0.46, 0.60)  |
| <b>Retinol activity equivalents</b>             |       |      |      |               |
| SFFQ2                                           | 0.14  | 0.09 | 0.10 | (0.01, 0.18)  |
| SFFQ1 and 2                                     | 0.15  | 0.10 | 0.11 | (0.03, 0.20)  |
| WebFFQ                                          | 0.18  | 0.11 | 0.13 | (0.05, 0.22)  |
| Single 7DDR                                     | 0.17  | 0.13 | 0.14 | (0.06, 0.23)  |
| Averaged 7DDR                                   | 0.18  | 0.13 | 0.15 | (0.07, 0.24)  |
| <b>Retinol activity equivalents<sup>b</sup></b> |       |      |      |               |
| Single ASA24                                    | 0.02  | 0.03 | 0.04 | (-0.16, 0.23) |
| Averaged ASA24                                  | 0.03  | 0.02 | 0.03 | (-0.14, 0.20) |
| SFFQ2                                           | 0.03  | 0.13 | 0.17 | (-0.01, 0.34) |
| SFFQ1 and 2                                     | 0.06  | 0.12 | 0.15 | (-0.02, 0.32) |
| WebFFQ                                          | 0.07  | 0.11 | 0.14 | (-0.04, 0.30) |
| Single 7DDR                                     | 0.09  | 0.13 | 0.17 | (-0.01, 0.33) |
| Averaged 7DDR                                   | 0.10  | 0.15 | 0.20 | (0.03, 0.37)  |
| <b>Alpha-tocopherol</b>                         |       |      |      |               |
| SFFQ2                                           | 0.49  | 0.52 | 0.65 | (0.57, 0.72)  |
| SFFQ1 and 2                                     | 0.51  | 0.54 | 0.67 | (0.59, 0.73)  |
| WebFFQ                                          | 0.50  | 0.54 | 0.67 | (0.59, 0.74)  |
| Single 7DDR                                     | 0.54  | 0.59 | 0.74 | (0.66, 0.81)  |
| Averaged 7DDR                                   | 0.57  | 0.64 | 0.79 | (0.71, 0.85)  |
| <b>Alpha-tocopherol<sup>b</sup></b>             |       |      |      |               |
| Single ASA24                                    | 0.09  | 0.08 | 0.08 | (-0.20, 0.34) |
| Averaged ASA24                                  | 0.13  | 0.07 | 0.08 | (-0.13, 0.29) |
| SFFQ2                                           | 0.11  | 0.22 | 0.29 | (0.08, 0.48)  |
| SFFQ1 and 2                                     | 0.13  | 0.27 | 0.37 | (0.15, 0.55)  |
| WebFFQ                                          | 0.16  | 0.27 | 0.38 | (0.16, 0.56)  |
| Single 7DDR                                     | 0.13  | 0.36 | 0.49 | (0.28, 0.67)  |
| Averaged 7DDR                                   | 0.15  | 0.40 | 0.54 | (0.33, 0.71)  |
| <b>Gamma-tocopherol</b>                         |       |      |      |               |
| SFFQ2                                           | 0.00  | 0.02 | 0.02 | (-0.07, 0.11) |
| SFFQ1 and 2                                     | -0.01 | 0.03 | 0.03 | (-0.06, 0.11) |
| WebFFQ                                          | 0.02  | 0.03 | 0.03 | (-0.06, 0.11) |
| Single 7DDR                                     | 0.11  | 0.11 | 0.12 | (0.03, 0.20)  |
| Averaged 7DDR                                   | 0.12  | 0.12 | 0.13 | (0.05, 0.22)  |
| <b>Dietary folate equivalents<sup>c</sup></b>   |       |      |      |               |
| SFFQ2                                           | 0.47  | 0.49 | 0.54 | (0.46, 0.61)  |
| SFFQ1 and 2                                     | 0.50  | 0.50 | 0.55 | (0.47, 0.62)  |
| WebFFQ                                          | 0.47  | 0.46 | 0.51 | (0.42, 0.58)  |

|                                               |      |      |      |              |
|-----------------------------------------------|------|------|------|--------------|
| Single 7DDR                                   | 0.57 | 0.57 | 0.63 | (0.56, 0.69) |
| Averaged 7DDR                                 | 0.61 | 0.61 | 0.68 | (0.60, 0.73) |
| <b>Dietary folate equivalents<sup>b</sup></b> |      |      |      |              |
| Single ASA24                                  | 0.31 | 0.29 | 0.31 | (0.13, 0.47) |
| Averaged ASA24                                | 0.43 | 0.40 | 0.43 | (0.27, 0.57) |
| SFFQ2                                         | 0.37 | 0.43 | 0.47 | (0.32, 0.60) |
| SFFQ1 and 2                                   | 0.40 | 0.44 | 0.47 | (0.32, 0.60) |
| WebFFQ                                        | 0.29 | 0.33 | 0.36 | (0.19, 0.50) |
| Single 7DDR                                   | 0.56 | 0.58 | 0.62 | (0.49, 0.73) |
| Averaged 7DDR                                 | 0.60 | 0.62 | 0.68 | (0.55, 0.78) |

---

Abbreviations: SFFQ, The semi-quantitative food frequency questionnaire; WebFFQ: web-based version of the SFFQ; 7DDR, 7 Day Dietary Records; ASA24, Web-based, self-administered 24-hour dietary recall; BMI, body mass index.

<sup>a</sup> Carotenoids, retinol, tocopherol and folate biomarkers and associated self-reported nutrients were adjusted for age and BMI at enrollment, current weight and smoking status at each measurement, self-reported nutrients were further adjusted for total energy intake, biomarkers were further adjusted for postmenopausal status, hormone use, and fasting status at blood drawing; plasma carotenoids, retinol and tocopherols was additionally adjusted for plasma lipids.

<sup>b</sup> Analyses for beta-carotene ( $N = 335$ ), retinol ( $N = 207$ ), alpha-tocopherol ( $N = 148$ ) and folate ( $N = 134$ ) were performed among subgroups of women not taking a supplement containing the corresponding nutrient.

<sup>c</sup> Plasma folate biomarker was measured among 456 participants.

**Web Table 6.** *P* values for pairwise comparisons among deattenuated and adjusted Spearman correlation coefficients with plasma fatty acids (% total fatty acids)<sup>a</sup> (data provided by 627 U.S. female nurses aged 45–80 years, 2010–2012)

| Comparison        | Saturated Fatty Acids | MUFA | ALA    | Long Chain Fatty acids | Linoleic acid | PUFA   | Trans-fatty acids |
|-------------------|-----------------------|------|--------|------------------------|---------------|--------|-------------------|
| SFFQ2             |                       |      |        |                        |               |        |                   |
| vs SFFQ1 and 2    | 0.63                  | 0.99 | 0.18   | 0.58                   | 0.23          | 0.53   | 0.99              |
| vs Single ASA24   | 0.14                  | 0.29 | 0.005  | <0.001                 | <0.001        | 0.002  | N/A               |
| vs Averaged ASA24 | 0.14                  | 0.30 | 0.003  | <0.001                 | 0.001         | 0.002  | N/A               |
| vs Single 7DDR    | 0.06                  | 0.23 | 0.17   | 0.41                   | 0.95          | 0.85   | 0.89              |
| vs Averaged 7DDR  | 0.06                  | 0.23 | 0.18   | 0.41                   | 0.99          | 0.77   | 0.90              |
| SFFQ1 and 2       |                       |      |        |                        |               |        |                   |
| vs Single ASA24   | 0.14                  | 0.24 | <0.001 | <0.001                 | 0.001         | 0.002  | N/A               |
| vs Averaged ASA24 | 0.14                  | 0.27 | <0.001 | <0.001                 | 0.002         | 0.002  | N/A               |
| vs Single 7DDR    | 0.02                  | 0.20 | 0.39   | 0.26                   | 0.54          | 0.55   | 0.87              |
| vs Averaged 7DDR  | 0.13                  | 0.19 | 0.41   | 0.26                   | 0.50          | 0.51   | 0.88              |
| Single ASA24      |                       |      |        |                        |               |        |                   |
| vs Averaged ASA24 | 0.91                  | 0.99 | 0.84   | 0.65                   | 0.77          | 0.97   | N/A               |
| vs Single 7DDR    | 0.001                 | 0.95 | <0.001 | <0.001                 | <0.001        | <0.001 | N/A               |
| vs Averaged 7DDR  | <0.001                | 0.94 | <0.001 | <0.001                 | <0.001        | <0.001 | N/A               |
| Averaged ASA24    |                       |      |        |                        |               |        |                   |
| vs Single 7DDR    | 0.001                 | 0.91 | <0.001 | <0.001                 | <0.001        | <0.001 | N/A               |
| vs Averaged 7DDR  | 0.001                 | 0.91 | <0.001 | <0.001                 | <0.001        | <0.001 | N/A               |
| Single 7DDR       |                       |      |        |                        |               |        |                   |
| vs Averaged 7DDR  | 1.00                  | 1.00 | 0.98   | 1.00                   | 1.00          | 0.99   | 0.99              |

Abbreviations: SFFQ, The semi-quantitative food frequency questionnaire; 7DDR, 7 Day Dietary Records; ASA24, Web-based, self-administered 24-hour dietary recall; MUFA, Monounsaturated Fatty Acids; ALA, alpha-linolenic acid; PUFA, Polyunsaturated Fatty Acids; BMI, body mass index.

<sup>a</sup>Fatty acid biomarkers and associated self-reported fatty acid composition were adjusted for age and BMI at enrollment, current weight and smoking status at each measurement, fatty acid biomarkers were further adjusted for postmenopausal status, hormone use, and fasting status at blood drawing;

<sup>b</sup>Analyses for long-chain n-3 fatty acids ( $N = 363$ ) were performed among subgroups of women not taking fatty acid supplement.

**Web Table 7.** *P* values for pairwise comparisons among deattenuated and adjusted Spearman correlation coefficients with plasma carotenoids, retinol, tocopherol and folate<sup>a</sup> (data provided by 627 U.S. female nurses aged 45–80 years, 2010–2012)

| Comparison        | Alpha carotene | Beta carotene <sup>b</sup> | Lutein-zeaxanthin | Beta cryptoxanthin | Lycopene | Retinol <sup>b</sup> | Alpha tocopherol <sup>b</sup> | Folate <sup>b</sup> |
|-------------------|----------------|----------------------------|-------------------|--------------------|----------|----------------------|-------------------------------|---------------------|
| SFFQ2             |                |                            |                   |                    |          |                      |                               |                     |
| vs SFFQ1 and 2    | 0.89           | 0.63                       | 0.86              | 0.61               | 0.24     | 0.61                 | 0.19                          | 0.52                |
| vs Single ASA24   | <0.001         | <0.001                     | 0.004             | 0.002              | <0.001   | 0.28                 | 0.62                          | 0.47                |
| vs Averaged ASA24 | <0.001         | <0.001                     | 0.002             | 0.002              | <0.001   | 0.19                 | 0.95                          | 0.15                |
| vs Single 7DDR    | 0.80           | 0.77                       | 0.10              | 0.61               | 0.71     | 0.98                 | 0.02                          | 0.40                |
| vs Averaged 7DDR  | 0.85           | 0.76                       | 0.09              | 0.54               | 0.68     | 0.88                 | 0.02                          | 0.40                |
| SFFQ1 and 2       |                |                            |                   |                    |          |                      |                               |                     |
| vs Single ASA24   | <0.001         | <0.001                     | 0.003             | <0.001             | <0.001   | 0.30                 | 0.83                          | 0.84                |
| vs Averaged ASA24 | <0.001         | <0.001                     | 0.001             | <0.001             | 0.002    | 0.25                 | 0.55                          | 0.31                |
| vs Single 7DDR    | 0.84           | 0.61                       | 0.06              | 0.48               | 0.33     | 0.76                 | <0.001                        | 0.05                |
| vs Averaged 7DDR  | 0.89           | 0.57                       | 0.06              | 0.39               | 0.28     | 0.65                 | <0.001                        | 0.05                |
| Single ASA24      |                |                            |                   |                    |          |                      |                               |                     |
| vs Averaged ASA24 | 0.79           | 0.91                       | 0.71              | 0.99               | 0.88     | 0.88                 | 0.92                          | 0.65                |
| vs Single 7DDR    | <0.001         | <0.001                     | <0.001            | 0.003              | <0.001   | 0.12                 | 0.01                          | 0.01                |
| vs Averaged 7DDR  | <0.001         | <0.001                     | <0.001            | 0.007              | <0.001   | 0.14                 | 0.01                          | 0.01                |
| Averaged ASA24    |                |                            |                   |                    |          |                      |                               |                     |
| vs Single 7DDR    | <0.001         | <0.001                     | <0.001            | 0.004              | <0.001   | 0.09                 | 0.01                          | 0.04                |
| vs Averaged 7DDR  | <0.001         | <0.001                     | <0.001            | 0.006              | <0.001   | 0.09                 | 0.01                          | 0.03                |
| Single 7DDR       |                |                            |                   |                    |          |                      |                               |                     |
| vs Averaged 7DDR  | 1.00           | 0.98                       | 0.99              | 0.99               | 0.99     | 0.99                 | 1.00                          | 1.00                |

Abbreviations: SFFQ, The semi-quantitative food frequency questionnaire; 7DDR, 7 Day Dietary Records; ASA24, Web-based, self-administered 24-hour dietary recall; BMI, body mass index.

<sup>a</sup>Carotenoids, retinol, tocopherol and folate biomarkers and associated self-reported nutrients were adjusted for age and BMI at enrollment, current weight and smoking status at each measurement, self-reported nutrients were further adjusted for total energy intake, biomarkers were further adjusted for postmenopausal status, hormone use, and fasting status at blood drawing; Plasma carotenoids, retinol and tocopherols was additionally adjusted for plasma lipids.

<sup>b</sup>Analyses for beta-carotene ( $N = 335$ ), retinol ( $N = 207$ ), alpha-tocopherol ( $N = 148$ ) and folate ( $N = 134$ ) were performed among subgroups of women not taking a supplement containing the corresponding nutrient.



**Web Table 8.** Distribution of fatty acids ( of total fatty acids) estimated by SFFQ, 7DDR, ASA24, and biomarkers (data provided by 627 U.S. female nurses aged 45–80 years, 2010–2012)

| Fatty Acid                         | Biomarker             | Paper SFFQ2                        |                                     | 7DDR                 | ASA24          |
|------------------------------------|-----------------------|------------------------------------|-------------------------------------|----------------------|----------------|
|                                    | Blood 1 and 2 average | Harvard <sup>a</sup> nutrient base | Standard <sup>a</sup> nutrient base | Week 1 and 2 average | Day1-4 average |
| <b>Saturated fatty acids</b>       |                       |                                    |                                     |                      |                |
| 12:00                              | 0.02 ± 0.03           | 1.6 ± 1.4                          | 0.9 ± 0.9                           | 1.5 ± 1.1            | 1.2 ± 1.1      |
| 14:00                              | 0.5 ± 0.2             | 3.4 ± 1.3                          | 2.5 ± 0.9                           | 3.0 ± 0.9            | 3.1 ± 1.3      |
| 16:00                              | 19.3 ± 2.1            | 19.7 ± 2.6                         | 17.5 ± 2.1                          | 17.2 ± 1.8           | 17.6 ± 2.4     |
| 18:00                              | 9.4 ± 1.7             | 8.2 ± 1.9                          | 7.9 ± 1.8                           | 7.9 ± 1.2            | 8.4 ± 2.1      |
| Total                              | 31.4 ± 2.7            | 35.6 ± 6.2                         | 31.7 ± 5.5                          | 33.1 ± 4.7           | 33.8 ± 6.2     |
| <b>Monounsaturated fatty acids</b> |                       |                                    |                                     |                      |                |
| 16:1n-7c                           | 1.5 ± 0.6             | 1.5 ± 0.3                          | 1.5 ± 0.3                           | 1.5 ± 0.3            | 1.5 ± 0.5      |
| 18:1n-9c                           | 18.3 ± 2.4            | 32.4 ± 4.3                         | 35.3 ± 4.6                          | 33.9 ± 3.1           | 33.3 ± 3.8     |
| Total 18:1 <sup>b</sup>            | 20.6 ± 2.5            | 35.7 ± 4.2                         | 35.3 ± 4.6                          | 33.9 ± 3.1           | 33.3 ± 3.8     |
| 20:1n-9c                           | 0.13 ± 0.03           | 0.3 ± 0.2                          | 0.4 ± 0.2                           | 0.3 ± 0.1            | 0.28 ± 0.13    |
| Total                              | 22.2 ± 2.8            | 38.0 ± 4.2                         | 37.6 ± 4.6                          | 36.1 ± 3.1           | 35.6 ± 3.8     |
| <b>Polyunsaturated fatty acids</b> |                       |                                    |                                     |                      |                |
| n-3                                |                       |                                    |                                     |                      |                |
| 18:3n-3c                           | 0.6 ± 0.2             | 2.3 ± 1.1                          | 2.2 ± 1.0                           | 2.3 ± 1.0            | 2.2 ± 1.0      |
| Total 18:3 <sup>c</sup>            | 1.1 ± 0.3             | 2.3 ± 1.1                          | 2.2 ± 1.0                           | 2.3 ± 1.0            | 2.2 ± 1.0      |
| 20:5n-3c                           | 1.0 ± 0.8             | 0.3 ± 0.3                          | 0.3 ± 0.3                           | 0.2 ± 0.4            | 0.1 ± 0.2      |
| 22:5n-3c                           | 0.6 ± 0.2             | 0.04 ± 0.04                        | 0.05 ± 0.04                         | 0.03 ± 0.04          | 0.04 ± 0.06    |
| 22:6n-3c                           | 1.9 ± 0.8             | 0.4 ± 0.3                          | 0.4 ± 0.3                           | 0.3 ± 0.3            | 0.2 ± 0.3      |
| Long Chain n-3 <sup>d</sup>        | 3.5 ± 1.6             | 0.8 ± 0.7                          | 0.8 ± 0.7                           | 0.5 ± 0.7            | N/A            |
| n-6                                |                       |                                    |                                     |                      |                |
| 18:2n-6c                           | 30.0 ± 3.7            | 18.1 ± 3.7                         | 17.9 ± 3.8                          | 19.5 ± 3.7           | 19.0 ± 4.9     |
| 18:3n-6c                           | 0.5 ± 0.2             | 0.02 ± 0.01                        | N/A                                 | N/A                  | N/A            |
| 20:2n-6c                           | 0.22 ± 0.04           | 0.04 ± 0.02                        | N/A                                 | N/A                  | N/A            |
| 20:4n-6c                           | 8.2 ± 1.9             | 0.2 ± 0.1                          | 0.3 ± 0.1                           | 0.2 ± 0.1            | 0.2 ± 0.1      |
| Total n-6                          | 40.7 ± 3.9            | 18.5 ± 3.7                         | N/A                                 | N/A                  | N/A            |

|                           |             |             |            |             |            |
|---------------------------|-------------|-------------|------------|-------------|------------|
| Total PUFA                | 44.8 ± 4.0  | 22.2 ± 4.6  | 21.5 ± 4.6 | 22.4 ± 4.2  | 21.9 ± 5.6 |
| <b>Trans-Fatty acids</b>  |             |             |            |             |            |
| t-16:1n-7                 | 0.13 ± 0.03 | 0.11 ± 0.04 | N/A        | 0.06 ± 0.03 | N/A        |
| Total 18:1 <i>trans</i> - | 0.8 ± 0.3   | 2.2 ± 0.6   | N/A        | 2.6 ± 1.0   | N/A        |
| Total 18:2 <i>trans</i> - | 0.2 ± 0.1   | 0.4 ± 0.1   | N/A        | 0.5 ± 0.1   | N/A        |
| Total trans               | 1.1 ± 0.4   | 2.7 ± 0.7   | N/A        | 3.3 ± 1.1   | N/A        |
| Believed to be trans      | 0.2 ± 0.1   | 0.5 ± 0.2   | N/A        | N/A         | N/A        |
| <b>Dairy fat</b>          |             |             |            |             |            |
| Derived dairy fat         | N/A         | N/A         | 19.0 ± 9.1 | N/A         | N/A        |
| 15:00                     | 0.15 ± 0.04 | N/A         | N/A        | N/A         | N/A        |
| 17:00                     | 0.33 ± 0.07 | N/A         | N/A        | 0.12 ± 0.05 | N/A        |
| t-16:1n-7                 | 0.13 ± 0.03 | N/A         | N/A        | N/A         | N/A        |

Abbreviations: SFFQ, The semi-quantitative food frequency questionnaire; 7DDR, 7 Day Dietary Records; ASA24, Web-based, self-administered 24-hour dietary recall; BMI, body mass index.

<sup>a</sup> In our SFFQ2, two sets of fatty acid variables were available. One type was derived based primarily on USDA sources (Standard) while the other one (Harvard) used updated analyses of commonly consumed brands and types of margarines, cooking fats, and processed foods conducted in the same laboratory as used for our plasma fatty acid analyses.

<sup>b</sup> Total 18:1 was the sum of 18:1n-9c and 18:1n-7c;

<sup>c</sup> Total 18:3 was the sum of alpha-linolenic (18:3n-3c) and gamma-linolenic (18:3n-6c).

<sup>d</sup> Long Chain n-3 fatty acid was the sum of 20:5n-3c, 22:5n-3c and 22:6n-3c.

**Web Table 9.** Reproducibility (rank intraclass correlation)<sup>a</sup> of fatty acids ( of total fatty acids) estimated by biomarkers, SFFQ, and 7DDR (data provided by 627 U.S. female nurses aged 45–80 years, 2010–2012)

| Variable                           | Biomarker  |          | 7DDR       |          | SFFQ (Harvard <sup>b</sup> ) |          | SFFQ (standard <sup>b</sup> ) |          |
|------------------------------------|------------|----------|------------|----------|------------------------------|----------|-------------------------------|----------|
|                                    | Unadjusted | Adjusted | Unadjusted | Adjusted | Unadjusted                   | Adjusted | Unadjusted                    | Adjusted |
| <b>Saturated fatty acids</b>       |            |          |            |          |                              |          |                               |          |
| 12:00                              | 0.13       | 0.14     | 0.40       | 0.40     | 0.62                         | 0.63     | 0.64                          | 0.61     |
| 14:00                              | 0.32       | 0.30     | 0.52       | 0.52     | 0.62                         | 0.61     | 0.62                          | 0.61     |
| 16:00                              | 0.52       | 0.47     | 0.54       | 0.54     | 0.63                         | 0.63     | 0.63                          | 0.63     |
| 18:00                              | 0.17       | 0.15     | 0.54       | 0.53     | 0.68                         | 0.67     | 0.67                          | 0.67     |
| Total                              | 0.21       | 0.20     | 0.58       | 0.58     | 0.65                         | 0.64     | 0.64                          | 0.64     |
| <b>Monounsaturated fatty acids</b> |            |          |            |          |                              |          |                               |          |
| 16:1n-7c                           | 0.77       | 0.73     | 0.50       | 0.50     | 0.57                         | 0.54     | 0.55                          | 0.56     |
| 18:1n-9c                           | 0.69       | 0.65     | 0.42       | 0.42     | 0.63                         | 0.61     | 0.62                          | 0.63     |
| Total 18:1 <sup>c</sup>            | 0.68       | 0.64     | 0.42       | 0.42     | 0.61                         | 0.61     | 0.62                          | 0.61     |
| 20:1n-9c                           | 0.41       | 0.39     | 0.34       | 0.34     | 0.63                         | 0.58     | 0.59                          | 0.61     |
| Total                              | 0.69       | 0.64     | 0.41       | 0.41     | 0.62                         | 0.62     | 0.62                          | 0.62     |
| <b>Polyunsaturated fatty acids</b> |            |          |            |          |                              |          |                               |          |
| n-3                                |            |          |            |          |                              |          |                               |          |
| 18:3n-3c                           | 0.59       | 0.57     | 0.48       | 0.47     | 0.59                         | 0.60     | 0.60                          | 0.58     |
| Total 18:3 <sup>d</sup>            | 0.55       | 0.54     | 0.48       | 0.47     | 0.59                         | 0.60     | 0.60                          | 0.58     |
| 20:5n-3c                           | 0.77       | 0.74     | 0.62       | 0.60     | 0.75                         | 0.72     | 0.75                          | 0.72     |
| 22:5n-3c                           | 0.63       | 0.60     | 0.43       | 0.43     | 0.72                         | 0.70     | 0.72                          | 0.67     |
| 22:6n-3c                           | 0.78       | 0.74     | 0.57       | 0.55     | 0.74                         | 0.73     | 0.74                          | 0.72     |
| Long Chain n-3 <sup>e</sup>        | 0.78       | 0.75     | 0.61       | 0.59     | 0.75                         | 0.74     | 0.75                          | 0.73     |
| n-6                                |            |          |            |          |                              |          |                               |          |
| 18:2n-6cc                          | 0.58       | 0.53     | 0.44       | 0.44     | 0.54                         | 0.54     | 0.55                          | 0.53     |
| 18:3n-6c                           | 0.66       | 0.64     | 0.48       | 0.47     | N/A                          | N/A      | N/A                           | N/A      |
| 20:2n-6c                           | 0.49       | 0.48     | 0.57       | 0.57     | N/A                          | N/A      | N/A                           | N/A      |
| 20:4n-6c                           | 0.77       | 0.73     | 0.50       | 0.50     | 0.63                         | 0.62     | 0.63                          | 0.62     |

|                                  |      |      |      |      |      |      |      |      |
|----------------------------------|------|------|------|------|------|------|------|------|
| Total n-6                        | 0.48 | 0.44 | 0.57 | 0.57 | N/A  | N/A  | N/A  | N/A  |
| Total PUFA                       | 0.43 | 0.38 | 0.46 | 0.46 | 0.58 | 0.59 | 0.60 | 0.58 |
| <b>Trans-fat</b>                 |      |      |      |      |      |      |      |      |
| t-16:1n-7                        | 0.39 | 0.39 | 0.41 | 0.41 | 0.66 | 0.54 | N/A  | N/A  |
| Total 18:1 <i>trans</i> -        | 0.22 | 0.20 | 0.40 | 0.39 | 0.64 | 0.61 | N/A  | N/A  |
| total 18:2 <i>trans</i> -isomers | 0.33 | 0.26 | 0.41 | 0.40 | 0.63 | 0.54 | N/A  | N/A  |
| Total 18:2 <i>trans</i> -        | 0.33 | 0.26 | 0.41 | 0.40 | 0.63 | 0.54 | N/A  | N/A  |
| Total trans                      | 0.25 | 0.23 | 0.41 | 0.40 | 0.65 | 0.63 | N/A  | N/A  |
| Believed to be trans             | 0.47 | 0.44 | N/A  | N/A  | 0.63 | 0.63 | N/A  | N/A  |
| <b>Dairy related fat</b>         |      |      |      |      |      |      |      |      |
| Derived dairy fat                | N/A  | N/A  | N/A  | N/A  | N/A  | N/A  | 0.59 | 0.59 |
| 15:00                            | 0.33 | 0.34 | N/A  | N/A  | N/A  | N/A  | N/A  | N/A  |
| 17:00                            | 0.31 | 0.32 | 0.41 | 0.40 | N/A  | N/A  | N/A  | N/A  |
| t-16:1n-7                        | 0.39 | 0.39 | 0.41 | 0.41 | 0.66 | 0.54 | N/A  | N/A  |

Abbreviations: SFFQ, The semi-quantitative food frequency questionnaire; 7DDR, 7 Day Dietary Records; ASA24, Web-based, self-administered 24-hour dietary recall; BMI, body mass index.

<sup>a</sup> Two plasma biomarkers, approximately 6 months apart; Two SFFQs, approximately one year apart; Two 7DDRs, approximately 6 months apart; Four ASA24s, approximately every three months over one year. Plasma fatty acid biomarker was adjusted for age and BMI at enrollment, current weight, smoking status postmenopausal status, hormone use, and fasting status at blood drawing at each measurement. Self-reported fat composition was adjusted for age and BMI at enrollment, current weight and smoking status at each measurement.

<sup>b</sup> In our SFFQ2, two sets of fatty acid variables were available. One type was derived based primarily on USDA sources (Standard) while the other one (Harvard) used updated analyses of commonly consumed brands and types of margarines, cooking fats, and processed foods conducted in the same laboratory as used for our plasma fatty acid analyses.

<sup>d</sup> Total 18:1 was the sum of 18:1n-9c and 18:1n-7c;

<sup>d</sup> Total 18:3 was the sum of alpha-linolenic (18:3n-3c) and gamma-linolenic (18:3n-6c).



|                           |      |      |      |      |      |      |      |      |      |      |      |      |
|---------------------------|------|------|------|------|------|------|------|------|------|------|------|------|
| Total PUFA                | 0.16 | 0.18 | 0.27 | 0.17 | 0.19 | 0.27 | 0.11 | 0.09 | 0.14 | 0.24 | 0.22 | 0.32 |
| <b>Trans-Fatty acids</b>  |      |      |      |      |      |      |      |      |      |      |      |      |
| t-16:1n-7                 | 0.29 | 0.31 | 0.39 | N/A  | N/A  | N/A  | N/A  | N/A  | N/A  | 0.26 | 0.26 | 0.36 |
| Total 18:1 <i>trans</i> - | 0.27 | 0.25 | 0.31 | N/A  | N/A  | N/A  | N/A  | N/A  | N/A  | 0.30 | 0.28 | 0.52 |
| Total 18:2 <i>trans</i> - | 0.28 | 0.27 | 0.42 | N/A  | N/A  | N/A  | N/A  | N/A  | N/A  | 0.30 | 0.29 | 0.48 |
| Total trans               | 0.29 | 0.27 | 0.33 | N/A  | N/A  | N/A  | N/A  | N/A  | N/A  | 0.33 | 0.30 | 0.53 |
| Believed to be trans      | 0.36 | 0.35 | 0.38 | N/A  |
| <b>Dairy fat</b>          |      |      |      |      |      |      |      |      |      |      |      |      |
| 15:00                     | N/A  | N/A  | N/A  | 0.26 | 0.25 | 0.36 | N/A  | N/A  | N/A  | N/A  | N/A  | N/A  |
| 17:00                     | N/A  | N/A  | N/A  | 0.06 | 0.06 | 0.07 | N/A  | N/A  | N/A  | 0.04 | 0.04 | 0.05 |
| t-16:1n-7                 | N/A  | N/A  | N/A  | 0.29 | 0.29 | 0.38 | N/A  | N/A  | N/A  | N/A  | N/A  | N/A  |

Abbreviations: SFFQ, The semi-quantitative food frequency questionnaire; 7DDR, 7 Day Dietary Records; ASA24, Web-based, self-administered 24-hour dietary recall; BMI, body mass index.

<sup>a</sup> In our SFFQ2, two sets of fatty acid variables were available. One type was derived based primarily on USDA sources (Standard) while the other one (Harvard) used updated analyses of commonly consumed brands and types of margarines, cooking fats, and processed foods conducted in the same laboratory as used for our plasma fatty acid analyses.

<sup>b</sup> Plasma fatty acid biomarker was adjusted for age and BMI at enrollment, current weight, smoking status postmenopausal status, hormone use, and fasting status at blood drawing at each measurement. Self-reported fat composition was adjusted for age and BMI at enrollment, current weight and smoking status at each measurement.

<sup>c</sup> Total 18:1 was the sum of 18:1n-9c and 18:1n-7c;

<sup>d</sup> Total 18:3 was the sum of alpha-linolenic (18:3n-3c) and gamma-linolenic (18:3n-6c).

<sup>e</sup> Long Chain n-3 fatty acid was the sum of 20:5n-3c, 22:5n-3c and 22:6n-3c.
